# Supplementary material for: Are immune-related adverse events associated with the efficacy of immune checkpoint inhibitors in patients with cancer? A systematic review and meta-analysis
Source: PubMed Central journal article supplement (PMC7169020; doi:10.1186/s12916-020-01549-2), 2020-04-20
Supplement: 12916_2020_1549_MOESM1_ESM.pdf [file 12916_2020_1549_MOESM1_ESM.pdf]

## **Additional file 1**

**Supplementary Methods. Literature search and data analyses.**

**Table S1. Additional characteristics of the eligible studies.**

**Table S2. The Newcastle-Ottawa Scale (NOS) quality assessment of the enrolled studies.**

**Figure S1. Subgroup analysis stratified by class of immune checkpoint inhibitors in the melanoma cohort.**

**Figure S2. Forest plot (fixed effects model) of the correlation between immune-related adverse event development and progression-free survival.**

**Figure S3. Subgroup analyses of the correlation between immune-related adverse event development and progression-free survival.**

**Figure S4. Sensitivity analysis of the impact of each individual study on the pooled effect. A) Overall survival; B) Progression-free survival.**

**Figure S5. Funnel plots of the overall survival results. (A) Without trim and fill; (B) With trim and fill.**

**Figure S6. Funnel plots of the overall survival results in large sample size studies.**

**Figure S7. Funnel plots of the progression-free survival results.**

## **Supplementary Methods. Literature search and data analyses**

### **Literature search**

A systematic literature search in the PubMed, EMBASE and Cochrane databases was conducted on March 22, 2019. The complete search strategy was (“irAEs” OR “immune-related adverse events” OR “treatment-related adverse events” OR “treatment-related AEs” OR “select adverse events” OR “select AEs” OR “select treatment-related adverse events” OR “select treatment-related AEs” OR “immune-mediated adverse events” OR “immune-mediated AEs”) AND (“efficacy” OR “benefit” OR “response” OR “outcome” OR “prognosis”) AND (“anti-PD-1” OR “PD-1” OR “anti-PD-L1” OR “PD-L1” OR “CTLA-4” OR “anti-CTLA-4” OR “nivolumab” OR “pembrolizumab” OR “atezolizumab” OR “durvalumab” OR “avelumab” OR “ipilimumab” OR “immune checkpoint inhibitor”) AND (“cancer” OR “tumor” OR “tumour” OR “neoplasm” OR “carcinoma”). An additional retrieval was conducted from inception to June 3, 2019 to identify recent published studies.

### **Data analyses**

According to the predefined protocol, subgroup analyses of OS were conducted for cancer type, class of ICIs, combination therapy, sample size, model, landmark analysis and approach of data extraction. Unlike OS, a subgroup analysis of PFS was not conducted for the class of ICIs because the ICIs investigated in 17 included studies were all classified as anti-PD-1 antibodies. Similarly, the approach of data extraction was also not considered for subgroup analyses because all 17 included studies, except one study, extracted data directly.

Supplementary Table 1: Additional characteristics of the eligible studies.

| Study                          | irAE type           | Country | Cancer stage          | Patient data source | Median irAE onset time (weeks) | Combination therapy          | Grading criteria | Adjusted variables                                                                         |
|--------------------------------|---------------------|---------|-----------------------|---------------------|--------------------------------|------------------------------|------------------|--------------------------------------------------------------------------------------------|
| Sanlorenzo, <sup>32</sup> 2015 | Skin                | USA     | Advanced              | On-trial            | NR                             | No                           | CTCAE 4.0        | Treatment cycles                                                                           |
| Keller, <sup>9</sup> 2016      | Rash                | USA     | III-IV                | On-trial            | 5.6                            | Peptide vaccine <sup>a</sup> | CTCAE 4.0        | Age, sex                                                                                   |
|                                | Pneumonitis         |         |                       |                     | 10.9                           |                              |                  |                                                                                            |
|                                | Vitiligo            |         |                       |                     | 5.4                            |                              |                  |                                                                                            |
|                                | Hypothyroidism      |         |                       |                     | 10.7                           |                              |                  |                                                                                            |
|                                | Mucositis           |         |                       |                     | 9.7                            |                              |                  |                                                                                            |
|                                | Diarrhea/colitis    |         |                       |                     | 4.2                            |                              |                  |                                                                                            |
|                                | Hyperthyroidism     |         |                       |                     | 9.1                            |                              |                  |                                                                                            |
|                                | Myalgias            |         |                       |                     | NR                             |                              |                  |                                                                                            |
| Haratani, <sup>10</sup> 2017   | Global              | Japan   | IIIB-IV               | Off-trial           | 4.1                            | No                           | CTCAE 4.0        | Sex, age, treatment lines, smoking status, mutational status, brain metastasis             |
|                                | Skin                |         |                       |                     | 5.7                            |                              |                  |                                                                                            |
|                                | Endocrine           |         |                       |                     | 4.6                            |                              |                  |                                                                                            |
| Kim, <sup>11</sup> 2017        | Thyroid dysfunction | Korea   | IV                    | Mixed               | 5.7                            | No                           | CTCAE 4.0        | Age, sex, current or former smoking status, pathological subtypes, stage, medication types |
| Judd, <sup>23</sup> 2017       | Global              | USA     | NR                    | Mixed               | NR                             | No                           | CTCAE            | Trial participation status, cancer type                                                    |
| Osorio, <sup>12</sup> 2017     | Thyroid dysfunction | USA     | IV                    | On-trial            | 6.0                            | No                           | CTCAE 4.0        | No                                                                                         |
| Nakamura, <sup>22</sup> 2017   | Vitiligo            | Japan   | III-IV                | Mixed               | 20.0                           | No                           | CTCAE 4.0        | No                                                                                         |
| Grangeon, <sup>14</sup> 2018   | Global              | France  | Advanced              | Off-trial           | NR                             | No                           | CTCAE 4.0        | No                                                                                         |
|                                | Thyroiditis         |         |                       |                     |                                |                              |                  |                                                                                            |
|                                | Colitis             |         |                       |                     |                                |                              |                  |                                                                                            |
|                                | Hepatitis           |         |                       |                     |                                |                              |                  |                                                                                            |
|                                | Pneumonitis         |         |                       |                     |                                |                              |                  |                                                                                            |
| Toi, <sup>18</sup> 2018        | Global              | Japan   | Advanced              | Off-trial           | 4.7                            | No                           | CTCAE 4.0        | No                                                                                         |
| Sato, <sup>31</sup> 2018       | Global              | Japan   | IIIB-IV               | Off-trial           | 7.1                            | No                           | CTCAE 4.0        | No                                                                                         |
| Rogado, <sup>25</sup> 2018     | Global              | Spain   | NR                    | Off-trial           | NR                             | No                           | CTCAE 4.0        | Age, sex, histology, ECOG PS, smoking habit, treatment lines, type of anti-PD-1 antibody   |
| Ricciuti, <sup>15</sup> 2018   | Global              | Italy   | Advanced or recurrent | Off-trial           | NR                             | No                           | CTCAE 4.0        | Age, ECOG PS, brain metastasis                                                             |
|                                | Endocrine           |         |                       |                     | 7.8                            |                              |                  |                                                                                            |
|                                | Hepatobiliary       |         |                       |                     | 21                             |                              |                  |                                                                                            |
|                                | Skin                |         |                       |                     | 9.8                            |                              |                  |                                                                                            |
|                                | Gastrointestinal    |         |                       |                     | 9.0                            |                              |                  |                                                                                            |
|                                | Lung                |         |                       |                     | 16.2                           |                              |                  |                                                                                            |
| Ksienski, <sup>24</sup> 2018   | Global              | Canada  | IV                    | Off-trial           | NR                             | No                           | CTCAE 4.0        | Age, sex, smoking status, CCI score, ECOG PS, liver                                        |

Supplementary Table 1: continued.

| Study                          | irAE type                                                                 | Country     | Cancer stage                   | Patient data source | Median irAE onset time (weeks) | Combination therapy          | Grading criteria | Adjusted variables                                                                                                                         |
|--------------------------------|---------------------------------------------------------------------------|-------------|--------------------------------|---------------------|--------------------------------|------------------------------|------------------|--------------------------------------------------------------------------------------------------------------------------------------------|
|                                |                                                                           |             |                                |                     |                                |                              |                  | metastases, brain metastases, line of therapy for PD-1 antibody                                                                            |
| Faje, <sup>8</sup> 2018        | Hypophysitis                                                              | USA         | IIIA-IV                        | Off-trial           | 9.8                            | No                           | NR               | Age, glucocorticoid dose, sex, serum LDL, tumor status, ECOG PS                                                                            |
| Indini, <sup>4</sup> 2018      | Global                                                                    | Italy       | IV                             | Off-trial           | NR                             | Peptide vaccine <sup>a</sup> | CTCAE 4.0        | Age, site of primary melanoma, metastatic sites, neutrophil to lymphocyte ratio, Lymphocyte to monocyte ratio, Lymphocyte ratio, LDH level |
| Lesueur, <sup>26</sup> 2018    | Global                                                                    | France      | IV                             | Off-trial           | NR                             | Radiotherapy <sup>b</sup>    | CTCAE 4.0        | ECOG PS                                                                                                                                    |
| Owen, <sup>5</sup> 2018        | Global                                                                    | USA         | Advanced                       | Mixed               | 12.0                           | No                           | CTCAE 4.0        | No                                                                                                                                         |
| Lisberg, <sup>27</sup> 2018    | Global                                                                    | USA         | Locally advanced or metastatic | On-trial            | NR                             | No                           | CTCAE 4.0        | Age, sex, treatment lines, PD-L1 proportion score, EGFR status, smoking status, histology                                                  |
| Fujimoto, <sup>30</sup> 2018   | Global<br>Pneumonitis                                                     | Japan       | IIIB-IV                        | Off-trial           | 8.0                            | No                           | CTCAE 4.0        | Age, sex, smoking status, ECOG PS, EGFR/ALK status, stage, treatment line, histology                                                       |
| Okada, <sup>6</sup> 2019       | Global                                                                    | Japan       | III-IV                         | Off-trial           | NR                             | No                           | CTCAE 4.0        | Neutrophil count, Age                                                                                                                      |
| Lei, <sup>16</sup> 2019        | Thyroiditis                                                               | USA         | III-IV                         | Off-trial           | NR                             | No                           | CTCAE 4.0        | No                                                                                                                                         |
| Cortellini, <sup>19</sup> 2019 | Global<br>Endocrine<br>Skin<br>Gastrointestinal<br>Pneumonitis<br>Hepatic | Italy       | Advanced                       | Off-trial           | NR                             | No                           | CTCAE 4.0        | OS: ECOG-PS, sex<br>PFS: ECOG-PS, treatment lines, metastatic sites                                                                        |
| Ahn, <sup>21</sup> 2019        | Global<br>Skin<br>Endocrine<br>Pneumonitis                                | Korea       | Advanced                       | Off-trial           | NR                             | No                           | CTCAE 4.0        | Age, sex, ECOG PS, smoking status, PD-L1 expression, liver metastasis, brain metastasis, treatment lines, EGFR/ALK status                  |
| Berner, <sup>20</sup> 2019     | Skin                                                                      | Switzerland | Advanced                       | Off-trial           | NR                             | No                           | NR               | No                                                                                                                                         |
| Verzoni, <sup>7</sup> 2019     | Global                                                                    | Italy       | Metastatic                     | Off-trial           | 6w                             | No                           | CTCAE 4.0        | Age, number of nivolumab doses                                                                                                             |
| Yamauchi, <sup>13</sup> 2019   | Thyroid                                                                   | Japan       | Advanced                       | Off-trial           | NR                             | No                           | NR               | No                                                                                                                                         |
| Bjørnhart, <sup>28</sup> 2019  | Global                                                                    | Denmark     | IIIA-IVB                       | Off-trial           | NR                             | No                           | CTCAE 4.0        | No                                                                                                                                         |

Supplementary Table 1: continued.

| Study                        | irAE type | Country    | Cancer stage | Patient data source | Median irAE onset time (weeks) | Combination therapy      | Grading criteria | Adjusted variables              |
|------------------------------|-----------|------------|--------------|---------------------|--------------------------------|--------------------------|------------------|---------------------------------|
| Ishihara, <sup>17</sup> 2019 | Global    | Japan      | Metastatic   | Off-trial           | 5.5 (1.8-15.6)                 | No                       | CTCAE 4.0        | Sex, histopathology, MSKCC risk |
| Moel, <sup>33</sup> 2019     | Global    | Netherland | IIIC-IV      | Off-trial           | NR                             | No                       | CTCAE 4.0        | No                              |
| Lang, <sup>29</sup> 2019     | Diarrhea  | Germany    | IV           | Off-trial           | 5.2 (0.3-13.1)                 | Vemurafenib <sup>a</sup> | CTCAE 4.0        | No                              |

Abbreviations: irAE, immune-related adverse event; USA, the United States of America; NR, not reported; CTCAE, The Common Terminology Criteria for Adverse Events; PD-1, programmed cell death 1; LDL, low density lipoprotein; ECOG PS, Eastern Cooperative Oncology Group Performance Status; CCI, Charlson comorbidity index; PD-L1, programmed cell death ligand 1; EGFR, epidermal growth factor receptor; ALK, anaplastic lymphoma kinase; OS, overall survival; PFS, progression-free survival; MSKCC, Memorial Sloan-Kettering Cancer Center.

<sup>a</sup> Combination therapy was adopted in part of the included cohort.

<sup>b</sup> Combination therapy was adopted in all of the included cohort.

Table S2: The Newcastle-Ottawa scale (NOS) quality assessment of the enrolled studies.

| Study ID                       | SELECTION                                |                                     |                           | COMPARABILITY                                                                         |                                                                              | OUTCOME               |                                                              |                                               | Total <sup>a</sup> |
|--------------------------------|------------------------------------------|-------------------------------------|---------------------------|---------------------------------------------------------------------------------------|------------------------------------------------------------------------------|-----------------------|--------------------------------------------------------------|-----------------------------------------------|--------------------|
|                                | Representativeness of the exposed cohort | Selection of the non-exposed cohort | Ascertainment of exposure | Demonstration that outcome of interest was not present at start of study <sup>b</sup> | Comparability of cohorts on the basis of the design or analysis <sup>c</sup> | Assessment of outcome | Was follow-up long enough for outcomes to occur <sup>d</sup> | Adequacy of follow up of cohorts <sup>e</sup> |                    |
| Sanlorenzo, <sup>32</sup> 2015 | truly*                                   | same institute*                     | record*                   | no                                                                                    | *                                                                            | record*               | no                                                           | yes*                                          | 6                  |
| Keller, <sup>9</sup> 2016      | somewhat*                                | same institute*                     | record*                   | no                                                                                    | **                                                                           | record*               | no                                                           | yes*                                          | 7                  |
| Haratani, <sup>10</sup> 2017   | somewhat*                                | same institute*                     | record*                   | no                                                                                    | **                                                                           | record*               | no                                                           | not clear                                     | 6                  |
| Kim, <sup>11</sup> 2017        | somewhat*                                | same institute*                     | record*                   | no                                                                                    | *                                                                            | record*               | no                                                           | not clear                                     | 5                  |
| Judd, <sup>23</sup> 2017       | truly*                                   | same institute*                     | record*                   | no                                                                                    | *                                                                            | record*               | yes*                                                         | not clear                                     | 6                  |
| Osorio, <sup>12</sup> 2017     | somewhat*                                | same institute*                     | record*                   | yes*                                                                                  | -                                                                            | record*               | yes*                                                         | not clear                                     | 6                  |
| Nakamura, <sup>22</sup> 2017   | somewhat*                                | same institute*                     | record*                   | no                                                                                    | -                                                                            | record*               | no                                                           | not clear                                     | 4                  |
| Grangeon, <sup>14</sup> 2018   | somewhat*                                | same institute*                     | record*                   | no                                                                                    | -                                                                            | record*               | no                                                           | not clear                                     | 4                  |
| Toi, <sup>18</sup> 2018        | somewhat*                                | same institute*                     | record*                   | no                                                                                    | -                                                                            | record*               | no                                                           | not clear                                     | 4                  |
| Sato, <sup>31</sup> 2018       | somewhat*                                | same institute*                     | record*                   | no                                                                                    | *                                                                            | record*               | no                                                           | not clear                                     | 5                  |
| Rogado, <sup>25</sup> 2018     | truly *                                  | same institute*                     | record*                   | no                                                                                    | *                                                                            | record*               | yes*                                                         | yes*                                          | 7                  |
| Ricciuti, <sup>15</sup> 2018   | somewhat*                                | same institute*                     | record*                   | no                                                                                    | *                                                                            | record*               | yes*                                                         | not clear                                     | 6                  |
| Ksienski, <sup>24</sup> 2018   | somewhat*                                | same institute*                     | record*                   | no                                                                                    | **                                                                           | record*               | yes*                                                         | not clear                                     | 7                  |
| Faje, <sup>8</sup> 2018        | somewhat*                                | not clear                           | record*                   | no                                                                                    | *                                                                            | record*               | yes*                                                         | not clear                                     | 5                  |
| Indini, <sup>4</sup> 2018      | somewhat*                                | same institute*                     | record*                   | no                                                                                    | *                                                                            | record*               | no                                                           | yes*                                          | 6                  |
| Lesueur, <sup>26</sup> 2018    | somewhat*                                | same institute*                     | record*                   | no                                                                                    | *                                                                            | record*               | not clear                                                    | not clear                                     | 5                  |
| Owen, <sup>5</sup> 2018        | somewhat*                                | same institute*                     | record*                   | no                                                                                    | -                                                                            | record*               | yes*                                                         | not clear                                     | 5                  |
| Lisberg, <sup>27</sup> 2018    | somewhat*                                | same institute*                     | record*                   | no                                                                                    | *                                                                            | record*               | yes*                                                         | yes*                                          | 7                  |
| Fujimoto, <sup>30</sup> 2018   | somewhat*                                | same institute*                     | record*                   | no                                                                                    | *                                                                            | record*               | not clear                                                    | not clear                                     | 5                  |
| Okada, <sup>6</sup> 2019       | somewhat*                                | same institute*                     | record*                   | no                                                                                    | *                                                                            | record*               | no                                                           | not clear                                     | 5                  |
| Lei, <sup>16</sup> 2019        | truly*                                   | same institute*                     | record*                   | no                                                                                    | -                                                                            | record*               | no                                                           | not clear                                     | 4                  |
| Cortellini, <sup>19</sup> 2019 | somewhat*                                | same institute*                     | record*                   | no                                                                                    | **                                                                           | record*               | yes*                                                         | not clear                                     | 7                  |
| Ahn, <sup>21</sup> 2019        | somewhat*                                | same institute*                     | record*                   | no                                                                                    | **                                                                           | record*               | yes*                                                         | yes*                                          | 8                  |

Table S2: continued.

| Study ID                      | SELECTION                                 |                                     |                           | COMPARABILITY                                                            |                                                                              | OUTCOME               |                                                              |                                               | Total <sup>a</sup> |
|-------------------------------|-------------------------------------------|-------------------------------------|---------------------------|--------------------------------------------------------------------------|------------------------------------------------------------------------------|-----------------------|--------------------------------------------------------------|-----------------------------------------------|--------------------|
|                               | Representative-ness of the exposed cohort | Selection of the non-exposed cohort | Ascertainment of exposure | Demonstration that outcome of interest was not present at start of study | Comparability of cohorts on the basis of the design or analysis <sup>b</sup> | Assessment of outcome | Was follow-up long enough for outcomes to occur <sup>c</sup> | Adequacy of follow up of cohorts <sup>d</sup> |                    |
| Berner, <sup>20</sup> 2019    | somewhat*                                 | same institute*                     | record*                   | yes*                                                                     | -                                                                            | record*               | not clear                                                    | not clear                                     | 5                  |
| Verzoni, <sup>7</sup> 2019    | somewhat*                                 | same institute*                     | record*                   | no                                                                       | *                                                                            | record*               | not clear                                                    | not clear                                     | 5                  |
| Yamauchi, <sup>13</sup> 2019  | truly*                                    | same institute*                     | record*                   | no                                                                       | -                                                                            | record*               | yes*                                                         | not clear                                     | 5                  |
| Bjørnhart, <sup>28</sup> 2019 | somewhat*                                 | same institute*                     | record*                   | no                                                                       | -                                                                            | record*               | not clear                                                    | yes*                                          | 5                  |
| Ishihara, <sup>17</sup> 2019  | somewhat*                                 | same institute*                     | record*                   | no                                                                       | *                                                                            | record*               | yes*                                                         | not clear                                     | 6                  |
| Moel, <sup>33</sup> 2019      | somewhat*                                 | same institute*                     | record*                   | no                                                                       | -                                                                            | record*               | not clear                                                    | not clear                                     | 4                  |
| Lang, <sup>29</sup> 2019      | somewhat*                                 | same institute*                     | record*                   | no                                                                       | -                                                                            | record*               | not clear                                                    | not clear                                     | 4                  |

- indicates Zero score, \* indicates one score, \*\* indicates two scores.

<sup>a</sup> Each study could be awarded a maximum of nine stars: a maximum of two stars for the item regarding comparability and a maximum of one star for other 7 items.

<sup>b</sup> One score was awarded if a study was a prospective cohort study.

<sup>c</sup> A maximum of two stars could be awarded for this item. If a study performed landmark analysis, one score was awarded. If a study adjusted for confounding factors (eg. ECOG PS, age, metastases status, serum low density lipoprotein level, prior treatment line, etc.), an additional score was awarded.

<sup>d</sup> For studies reporting OS or PFS, if median OS or PFS was reached, one score was awarded. For studies reporting both OS and PFS, only if median OS and PFS were both reached, one score was awarded.

<sup>e</sup> If a study reported a follow up rate of more than or equal to 80%, one score was awarded.

**Figure S1. Subgroup analysis stratified by class of immune checkpoint inhibitors in the melanoma cohort.**

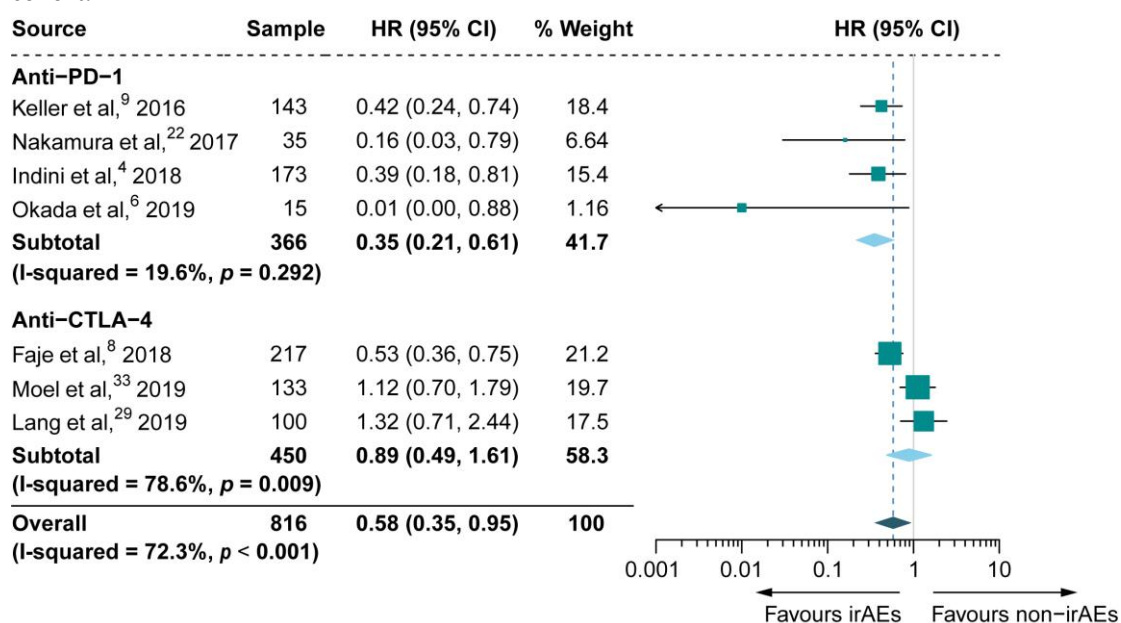

Abbreviations: HR, hazard ration; anti-PD-1, anti-programmed cell death-1; anti-CTLA-4, anti-cytotoxic T-lymphocyte antigen-4; irAEs, immune-related adverse events; non-irAEs, non-immune-related adverse events.



**Figure S2. Forest plot (random effects model) of the correlation between immune-related adverse event development and progression-free survival.**

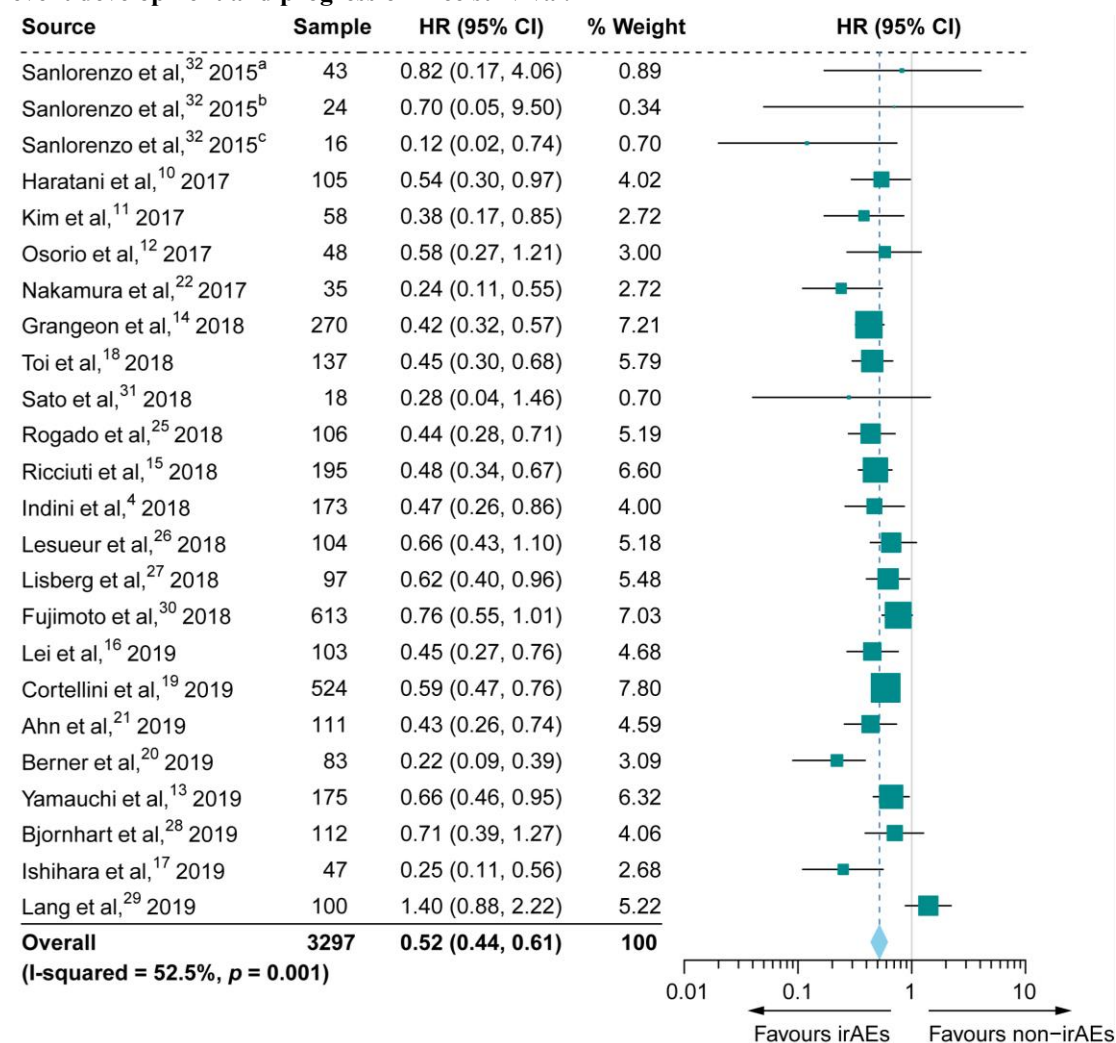

The sizes of the squares indicate the weight of the study. Abbreviations: HR, hazard ratio; irAEs, immune-related adverse events; non-irAEs, non-immune-related adverse events.

<sup>a</sup> The patient group received a dose of 10 mg/kg every 3 weeks.

<sup>b</sup> The patient group received a dose of 10 mg/kg every 2 weeks.

<sup>c</sup> The patient group received a dose of 2 mg/kg every 3 weeks.

**Figure S3. Subgroup analyses of the correlation between immune-related adverse event development and progression-free survival.**

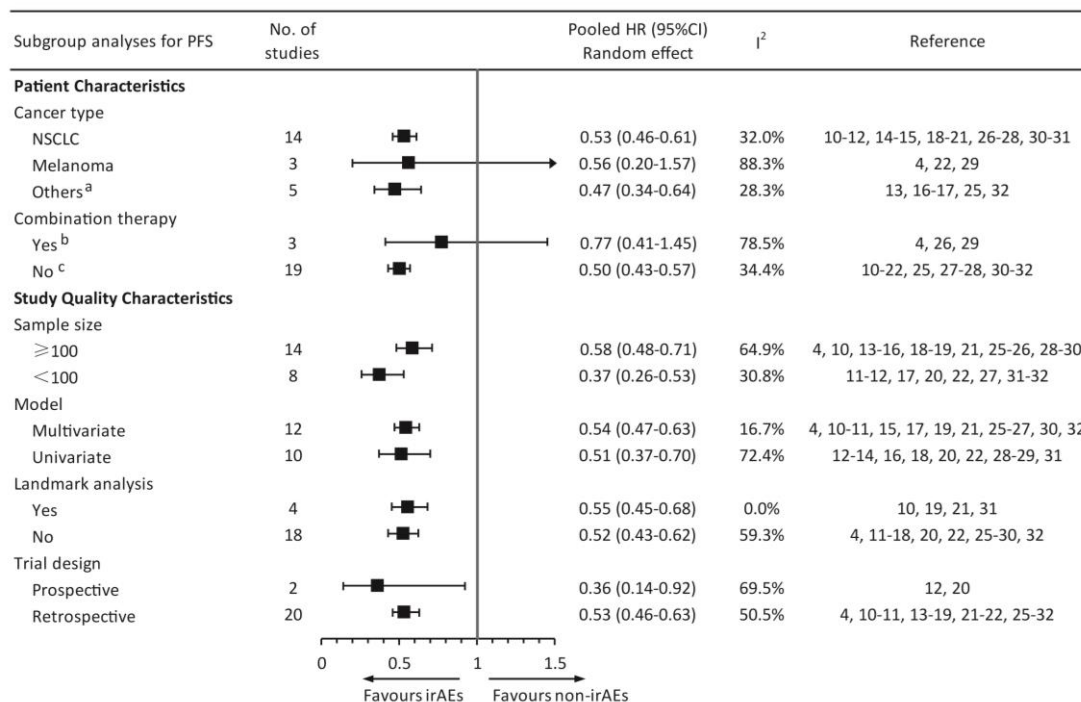

Abbreviations: PFS, progression-free survival; HR, hazard ratio; NSCLC, non-small cell lung cancer; irAEs, immune-related adverse events; non-irAEs, non-immune-related adverse events.

<sup>a</sup> This group included 4 multiple cancer types and 1 renal cell carcinoma.

<sup>b</sup> Yes indicates studies that combined ICIs with other therapy, including peptide vaccine (n=1), radiotherapy (n=1) and Vemurafenib (n=1).

<sup>c</sup> No indicates studies that adopted ICIs as monotherapy.

Figure S4. Sensitivity analysis of the impact of each individual study on the pooled effect. A) Overall survival; B) Progression-free survival.

**A**

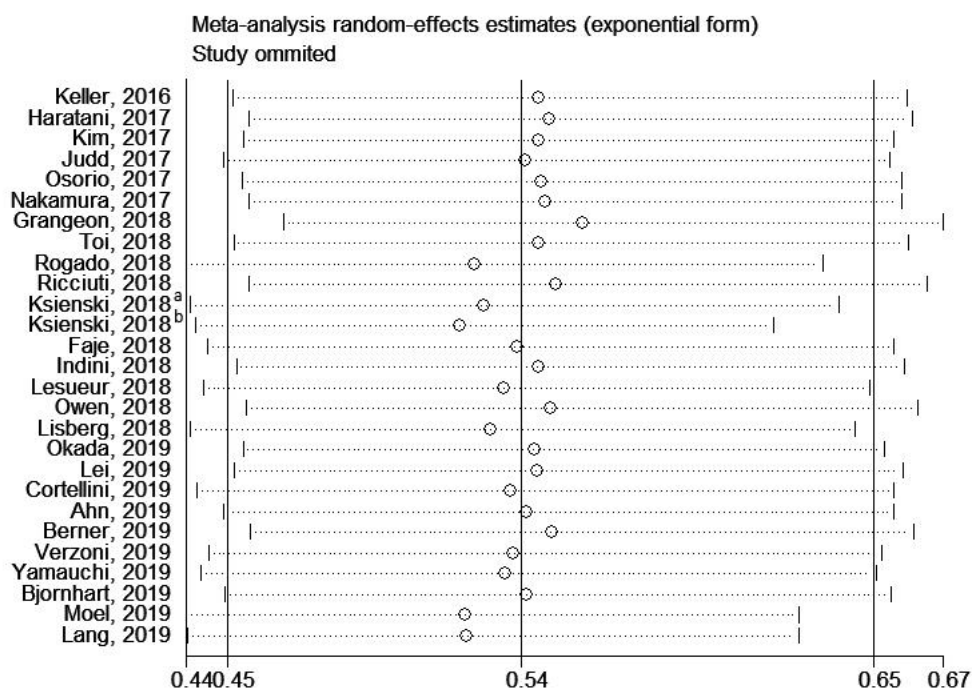

**B**

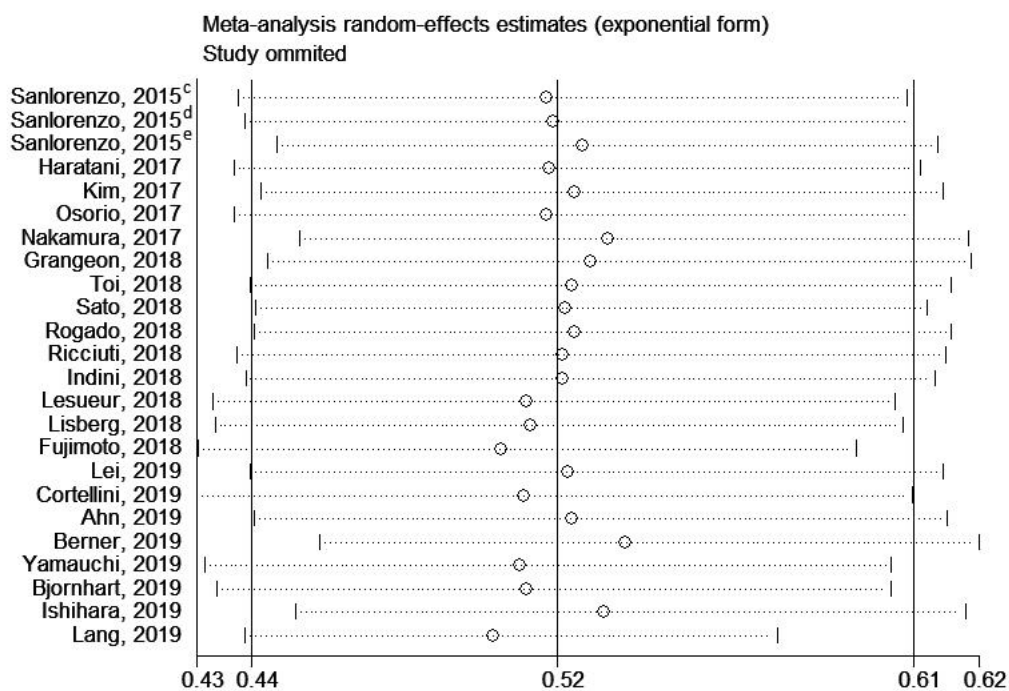

<sup>a</sup> Result for grade 1-2 immune-related adverse events (irAEs).

<sup>b</sup> Result for grade 3-4 irAEs.

<sup>c</sup> The patient group received a dose of 10 mg/kg every 3 weeks.

<sup>d</sup> The patient group received a dose of 10 mg/kg every 2 weeks.

<sup>e</sup> The patient group received a dose of 2 mg/kg every 3 weeks.

Figure S5. Funnel plots of the overall survival results. (A) Without trim and fill; (B) With trim and fill.

**A**

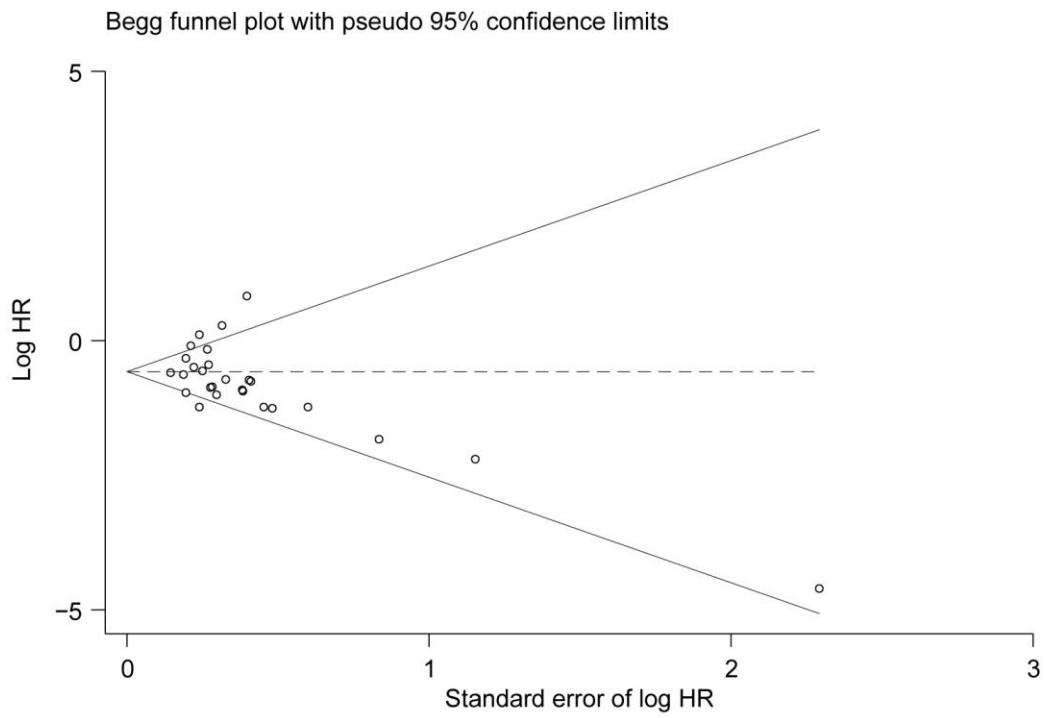

**B**

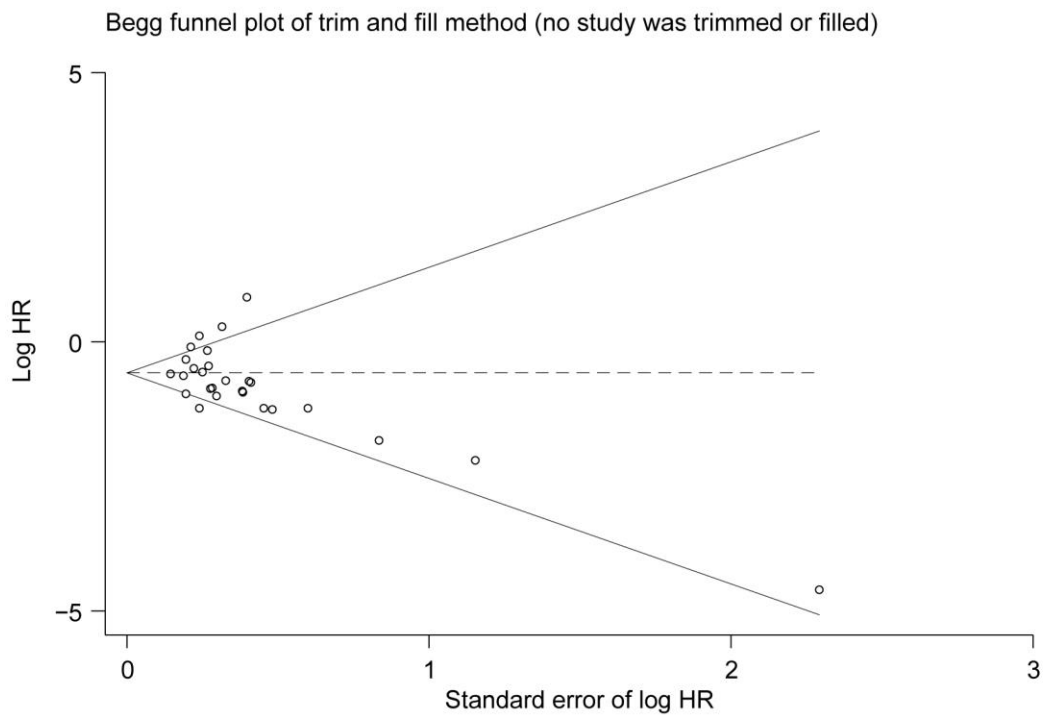

Abbreviation: HR, hazard ratio.

**Figure S6. Funnel plots of the overall survival results in large sample size studies.**

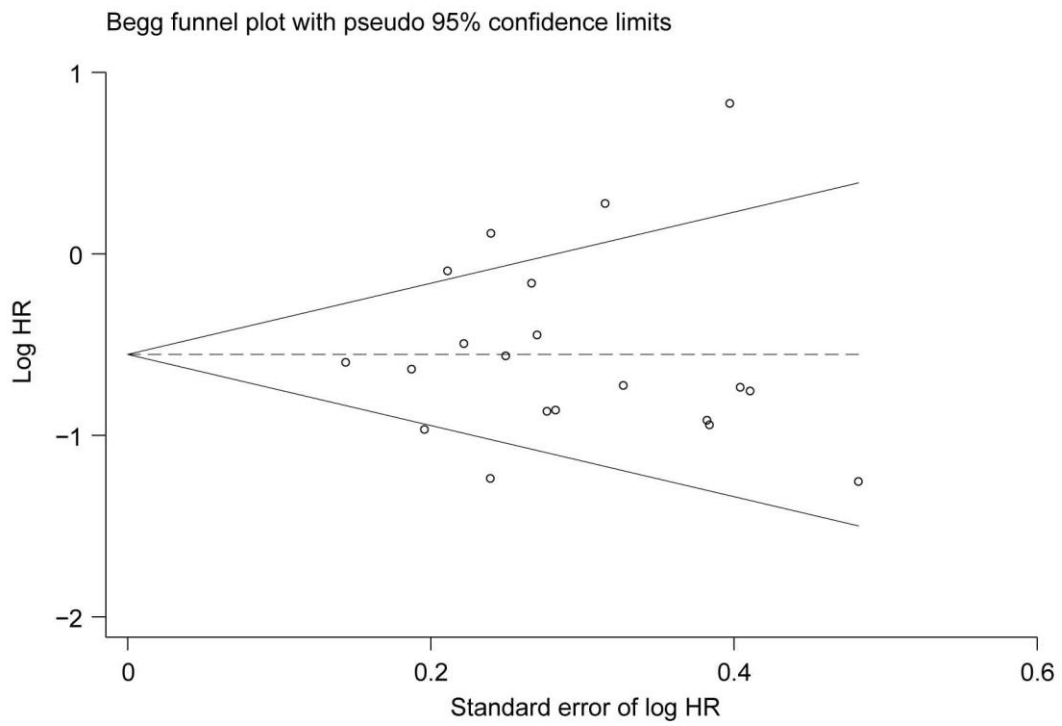

Abbreviation: HR, hazard ratio.

**Figure S7. Funnel plots of the progression-free survival results.**

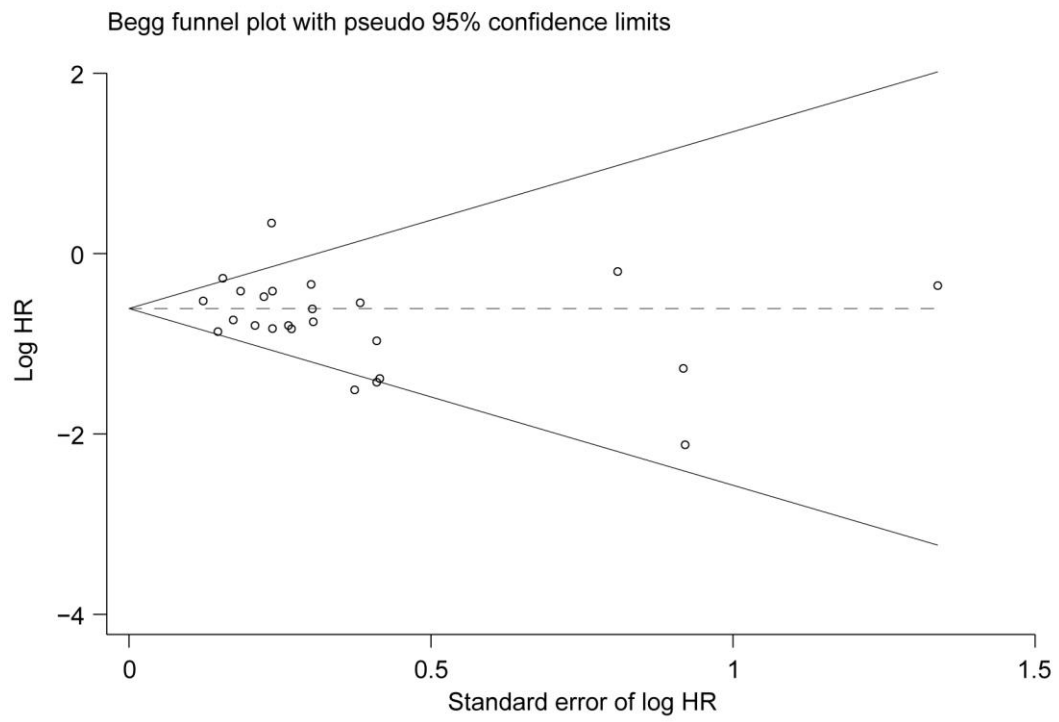

Abbreviation: HR, hazard ratio.
