# Supplementary material for: Are immune-related adverse events associated with the efficacy of immune checkpoint inhibitors in patients with cancer? A systematic review and meta-analysis
Source: PubMed Central journal article supplement (PMC7169020; doi:10.1186/s12916-020-01549-2), 2020-04-20
Supplement: 12916_2020_1549_MOESM2_ESM.pdf [file 12916_2020_1549_MOESM2_ESM.pdf]

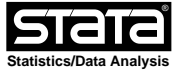

```

name: <unnamed>
log: C:\Users\Zhou Xiaoxiang\Downloads\Stata12.0\Trim_and_fill_record.smcl
log type: smcl
opened on: 7 Dec 2019, 09:08:39
    
```

```

1 . use "C:\Users\Zhou Xiaoxiang\Desktop\Any OS.dta", clear
2 . metan log_HR log_down log_upper, label(namevar=Study) random eform
    
```

| Study            | ES    | [95% Conf. Interval] |       | % Weight |
|------------------|-------|----------------------|-------|----------|
| Keller, 2016     | 0.423 | 0.243                | 0.735 | 4.26     |
| Haratani, 2017   | 0.285 | 0.102                | 0.675 | 2.46     |
| Kim, 2017        | 0.110 | 0.010                | 0.920 | 0.61     |
| Judd, 2017       | 0.480 | 0.227                | 1.107 | 3.04     |
| Osorio, 2017     | 0.290 | 0.090                | 0.940 | 1.82     |
| Nakamura, 2017   | 0.160 | 0.030                | 0.790 | 1.08     |
| Grangeon, 2018   | 0.290 | 0.180                | 0.460 | 4.78     |
| Toi, 2018        | 0.420 | 0.240                | 0.710 | 4.33     |
| Rogado, 2018     | 0.909 | 0.625                | 1.429 | 5.13     |
| Ricciuti, 2018   | 0.380 | 0.260                | 0.560 | 5.32     |
| Ksienski, 2018   | 0.850 | 0.500                | 1.420 | 4.45     |
| Ksienski, 2018   | 2.290 | 1.050                | 4.980 | 3.10     |
| Faje, 2018       | 0.530 | 0.360                | 0.750 | 5.43     |
| Indini, 2018     | 0.390 | 0.180                | 0.810 | 3.22     |
| Lesueur, 2018    | 0.640 | 0.377                | 1.087 | 4.41     |
| Owen, 2018       | 0.364 | 0.203                | 0.649 | 4.10     |
| Lisberg, 2018    | 0.720 | 0.490                | 1.050 | 5.34     |
| Okada, 2019      | 0.010 | 0.000                | 0.880 | 0.16     |
| Lei, 2019        | 0.400 | 0.190                | 0.850 | 3.23     |
| Cortellini, 2019 | 0.550 | 0.410                | 0.720 | 5.95     |
| Ahn, 2019        | 0.484 | 0.255                | 0.919 | 3.77     |
| Berner, 2019     | 0.290 | 0.120                | 0.710 | 2.66     |
| Verzoni, 2019    | 0.570 | 0.350                | 0.930 | 4.66     |
| Yamauchi, 2019   | 0.610 | 0.390                | 0.930 | 5.00     |
| Bjornhart, 2019  | 0.470 | 0.210                | 1.050 | 2.99     |
| Moel, 2019       | 1.120 | 0.700                | 1.790 | 4.78     |
| Lang, 2019       | 1.320 | 0.710                | 2.440 | 3.90     |
| D+L pooled ES    | 0.541 | 0.450                | 0.651 | 100.00   |

Heterogeneity calculated by formula  
 $Q = \text{SIGMA}_i \{ (1/\text{variance}_i) * (\text{effect}_i - \text{effect\_pooled})^2 \}$   
 where  $\text{variance}_i = ((\text{upper limit} - \text{lower limit}) / (2 * z))^2$

Heterogeneity chi-squared = **68.72** (d.f. = 26) p = **0.000**  
 I-squared (variation in ES attributable to heterogeneity) = **62.2%**  
 Estimate of between-study variance Tau-squared = **0.1285**

Test of ES=1 : z= **6.52** p = **0.000**

```

3 . metatrim log_HR selog_HR, reffect eform funnel
    
```

Note: default data input format (theta, se\_theta) assumed.

Meta-analysis

| Method | 95% CI     |        |        | Asymptotic |         | No. of studies |
|--------|------------|--------|--------|------------|---------|----------------|
|        | Pooled Est | Lower  | Upper  | z_value    | p_value |                |
| Fixed  | -0.577     | -0.682 | -0.473 | -10.862    | 0.000   | 27             |
| Random | -0.614     | -0.799 | -0.429 | -6.516     | 0.000   |                |

Test for heterogeneity: Q= **68.723** on **26** degrees of freedom (p= **0.000**)  
 Moment-based estimate of between studies variance = **0.129**

Trimming estimator: **Linear**  
 Meta-analysis type: **Random-effects model**

| iteration | estimate | Tn  | # to trim | diff |
|-----------|----------|-----|-----------|------|
| 1         | -0.614   | 131 | 0         | 378  |
| 2         | -0.614   | 131 | 0         | 0    |

Note: no trimming performed; data unchanged

Filled

Meta-analysis (exponential form)

| Method | Pooled Est | 95% CI |       | Asymptotic |         | No. of studies |
|--------|------------|--------|-------|------------|---------|----------------|
|        |            | Lower  | Upper | z_value    | p_value |                |
| Fixed  | 0.561      | 0.506  | 0.623 | -10.862    | 0.000   | 27             |
| Random | 0.541      | 0.450  | 0.651 | -6.516     | 0.000   |                |

Test for heterogeneity: Q= 68.723 on 26 degrees of freedom (p= 0.000)

Moment-based estimate of between studies variance = 0.129

```

4 . log close
   name: <unnamed>
   log: C:\Users\Zhou Xiaoxiang\Downloads\Stata12.0\Trim_and_fill_record.smcl
   log type: smcl
   closed on: 7 Dec 2019, 09:09:58

```

---
